# Supplementary material for: A duplex DNA–gold nanoparticle probe composed as a colorimetric biosensor for sequence-specific DNA-binding proteins
Source: Royal Society of Chemistry journal article supplement (doi:10.1039/c6an00033a), 2016-01-01
Supplement: c6an00033a1.pdf [file c6an00033a1.pdf]

**Electronic Supplementary Information (ESI)**

Duplex DNA-gold nanoparticle probe composed as colorimetric biosensor for sequence-specific DNA-binding protein

Junho Ahn, Yeonweon Choi, Ae-Ree Lee, Joon-Hwa Lee, and Jong Hwa Jung\*

Department of Chemistry and Research Institute of Natural Sciences, Gyeongsang National University, Jinju, South Korea. E-mail: *jonghwa@gnu.ac.kr*; Fax: +82-55-758-6027; Tel: +82-55-772-1488

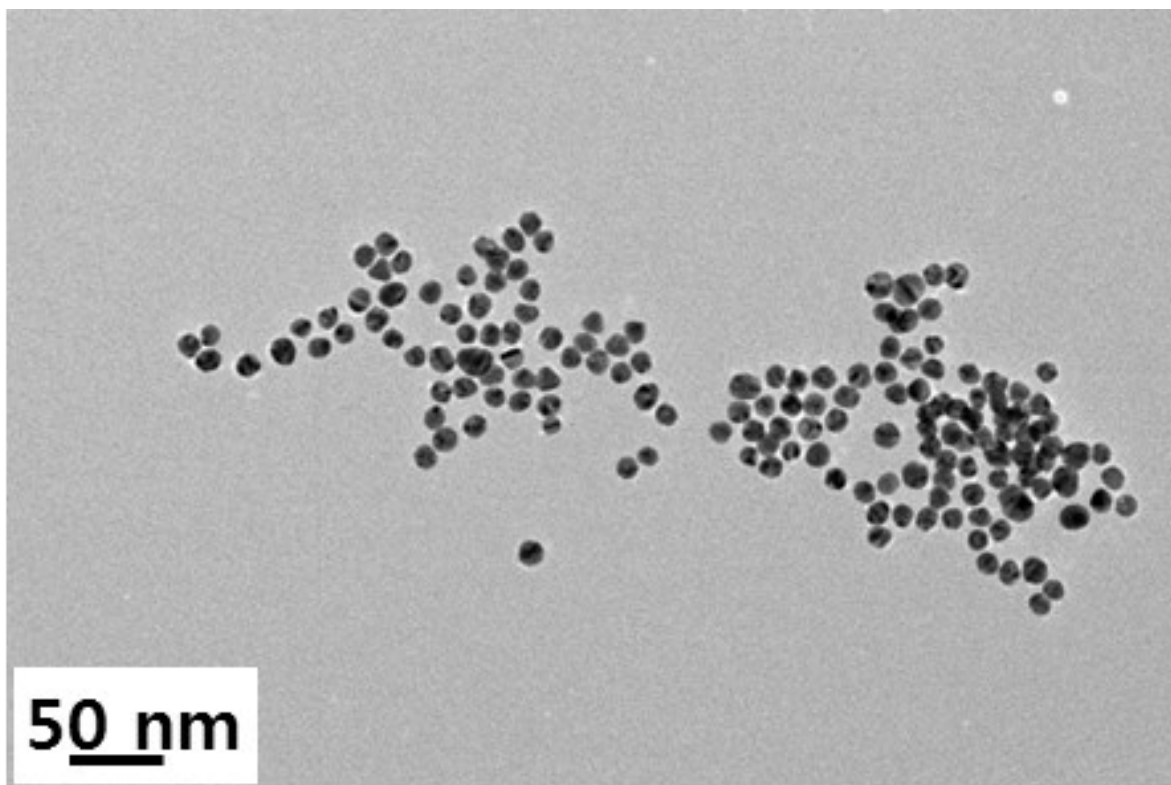

**Fig. S1** TEM image of DNA-Au-2.

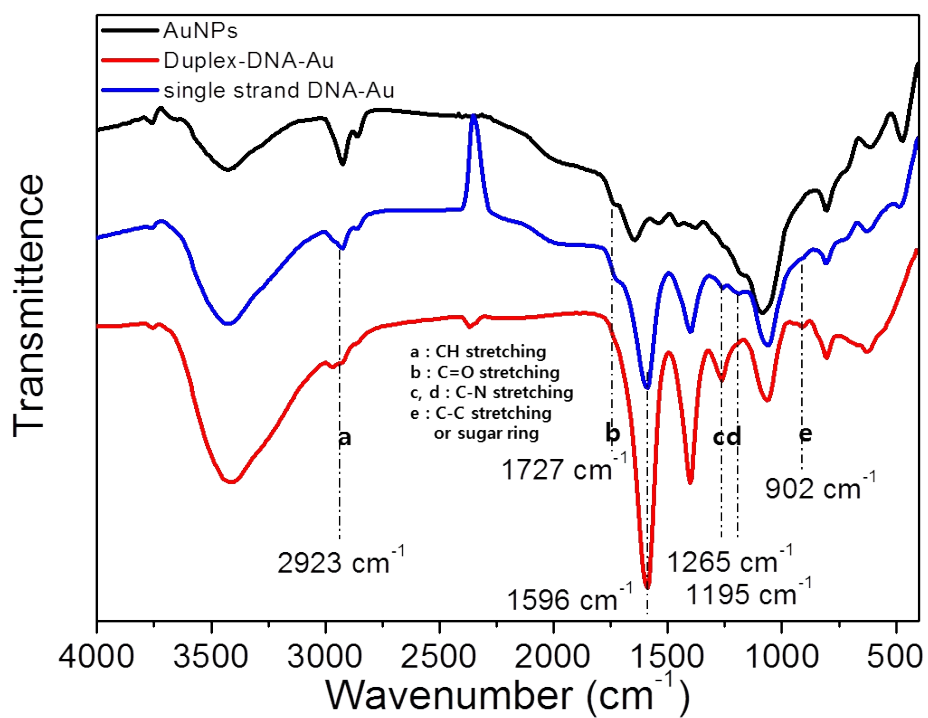

**Fig. S2** IR spectra of Au, DNA-Au, and duplex DNA-Au.

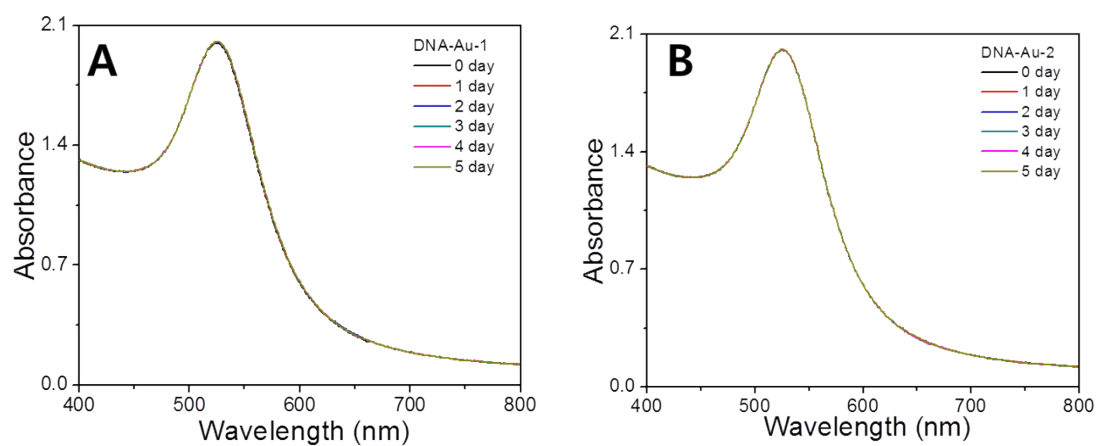

**Fig. S3** Time dependent measurements of UV-Vis spectra of (A) **DNA-Au-1**; (B) **DNA-Au-2**.

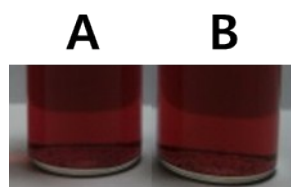

**Fig. S4** Photographs of (A) Duplex DNA-Au; (B) **DNA-Au-2**.

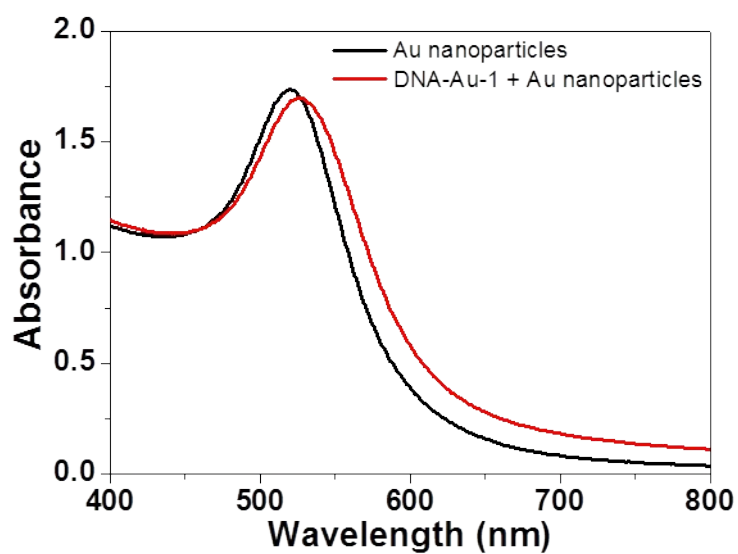

**Fig. S5** UV-Vis spectra of Au and mixed **DNA-Au-1** with Au.

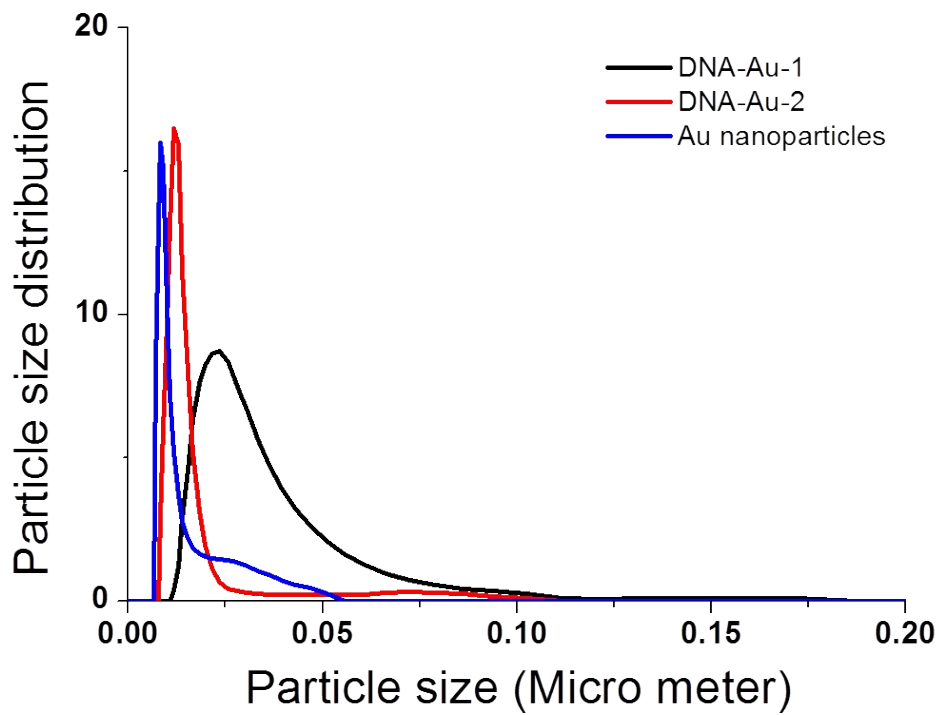

**Fig. S6** Dynamic light scattering of Au, DNA-Au-1, and DNA-Au-2.

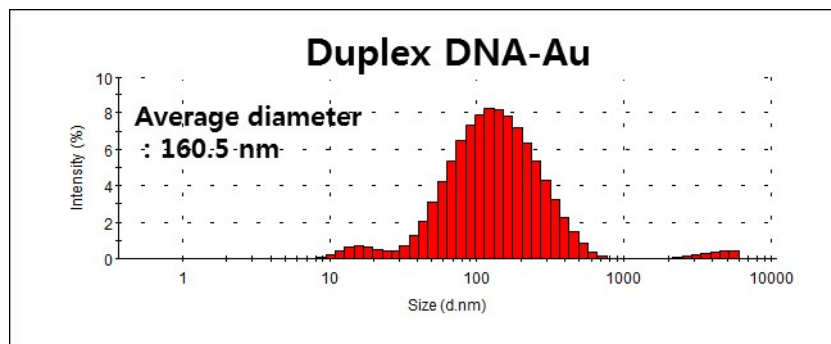

**Fig. S7** DLS measurements of duplex DNA-Au

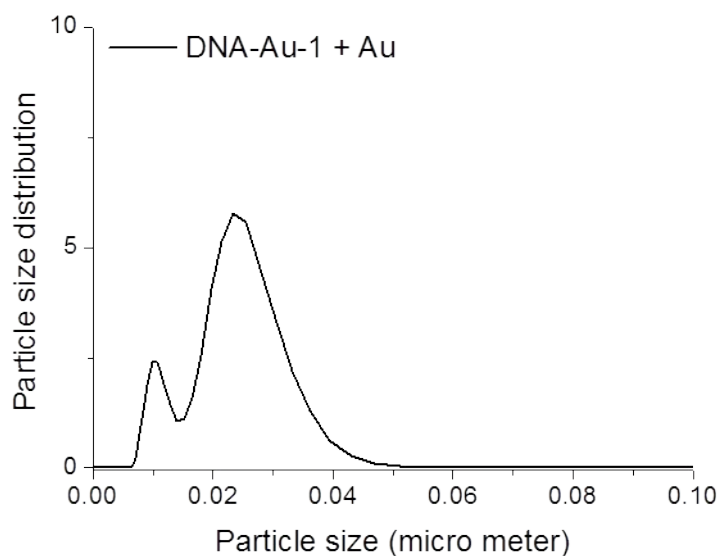

**Fig. S8** Dynamic light scattering of mixed **DNA-Au-1** with bare Au nanoparticles.

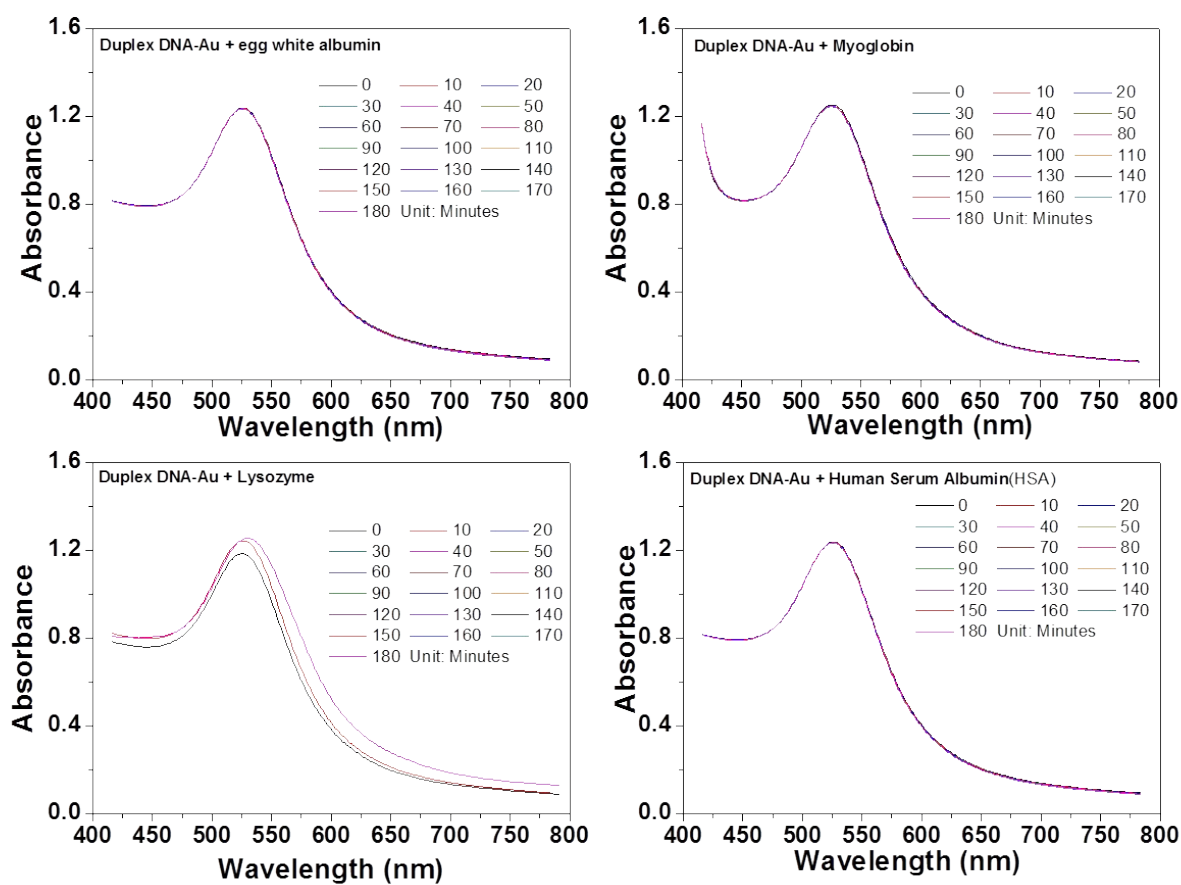

**Fig. S9** Time dependent UV-Vis spectra change of duplex DNA-Au (1 nmol) upon adding egg white albumin(10 nmol), myoglobin(10 nmol), lysozyme(10 nmol), HAS(10 nmol), respectively.

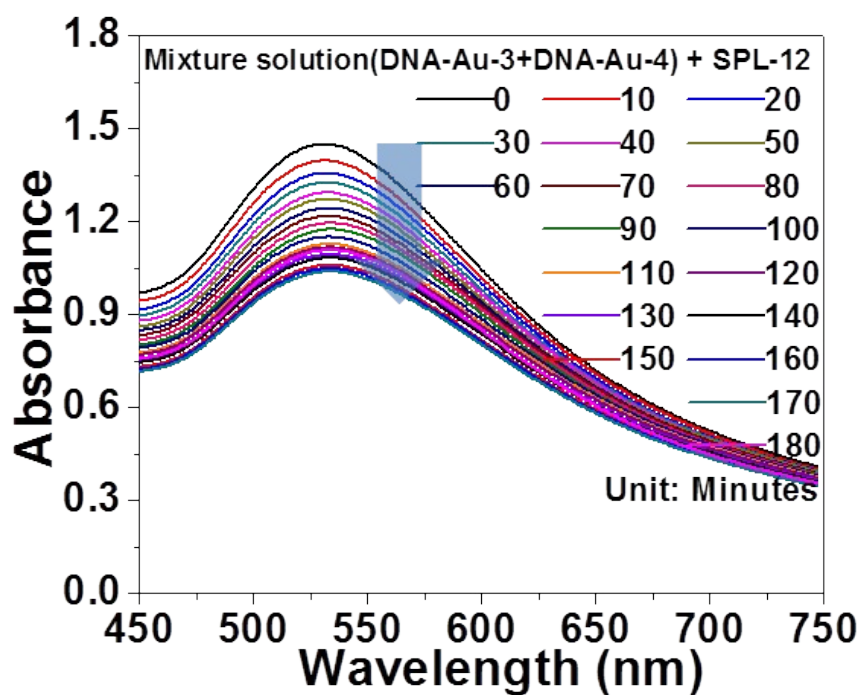

**Fig. S10** Time dependent measurements of UV-Vis spectra of 1 nmol duplex DNA-Au solution (mixture of DNA-Au-3 with DNA-Au-4), upon addition of 10 nmol SPL-12. DNA 3: SH-CCC AGG TTC TCTAAAAAAAAA, DNA 4: SH-ACG CAT CTG TGATTTTTTTTT.

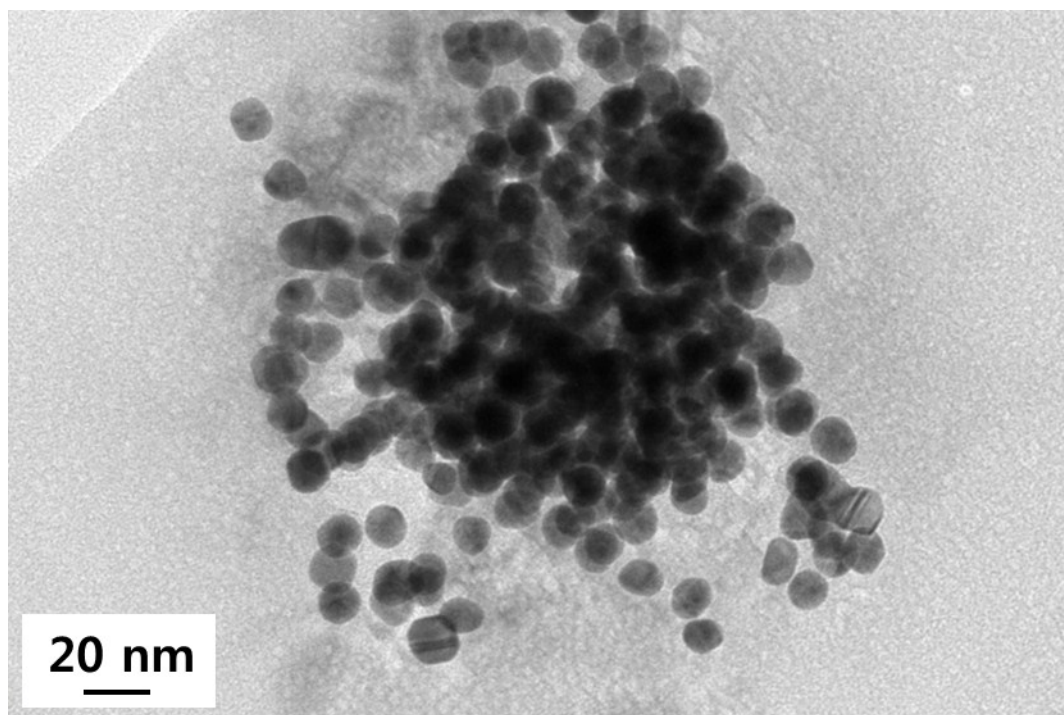

**Fig. S11** TEM image of duplex DNA-Au (1 nmol) upon addition of SPL-12 (10 nmol).

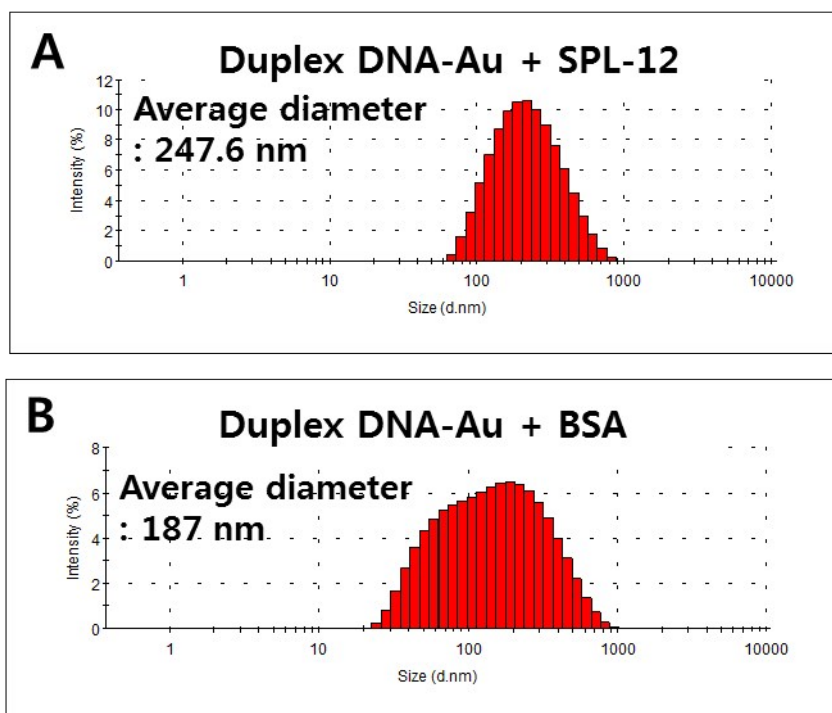

**Fig. S12** DLS measurements of duplex DNA-Au upon addition of (A) BSA(10 nmol); or (B) SPL-12(10 nmol).

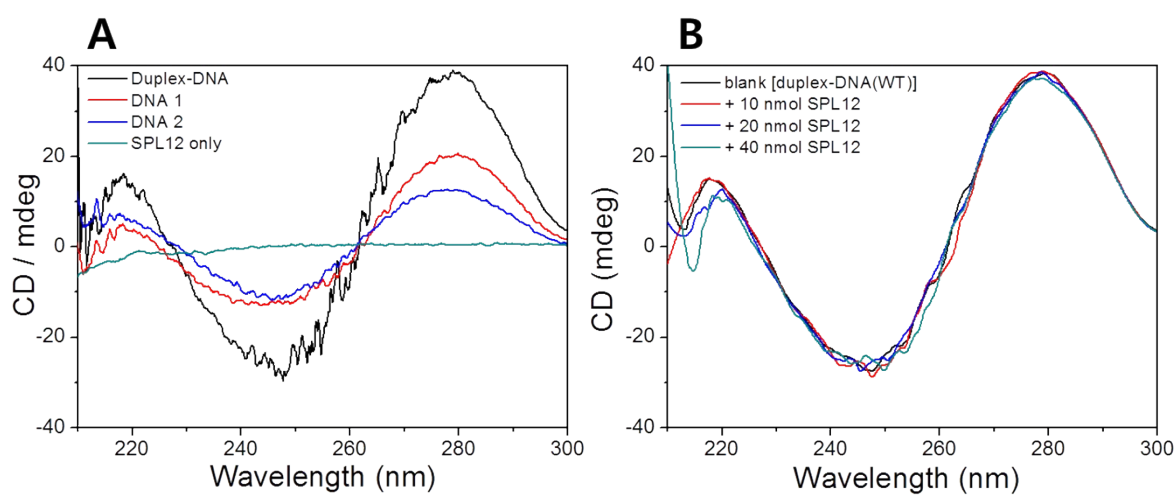

**Fig. S13** CD spectra of (A) DNA 1 (20 nmol), DNA 2 (20 nmol), duplex DNA (20 nmol) and SPL-12; (B) CD spectra of duplex DNA upon addition of SPL-12 (0, 10, 20, and 40 nmol).

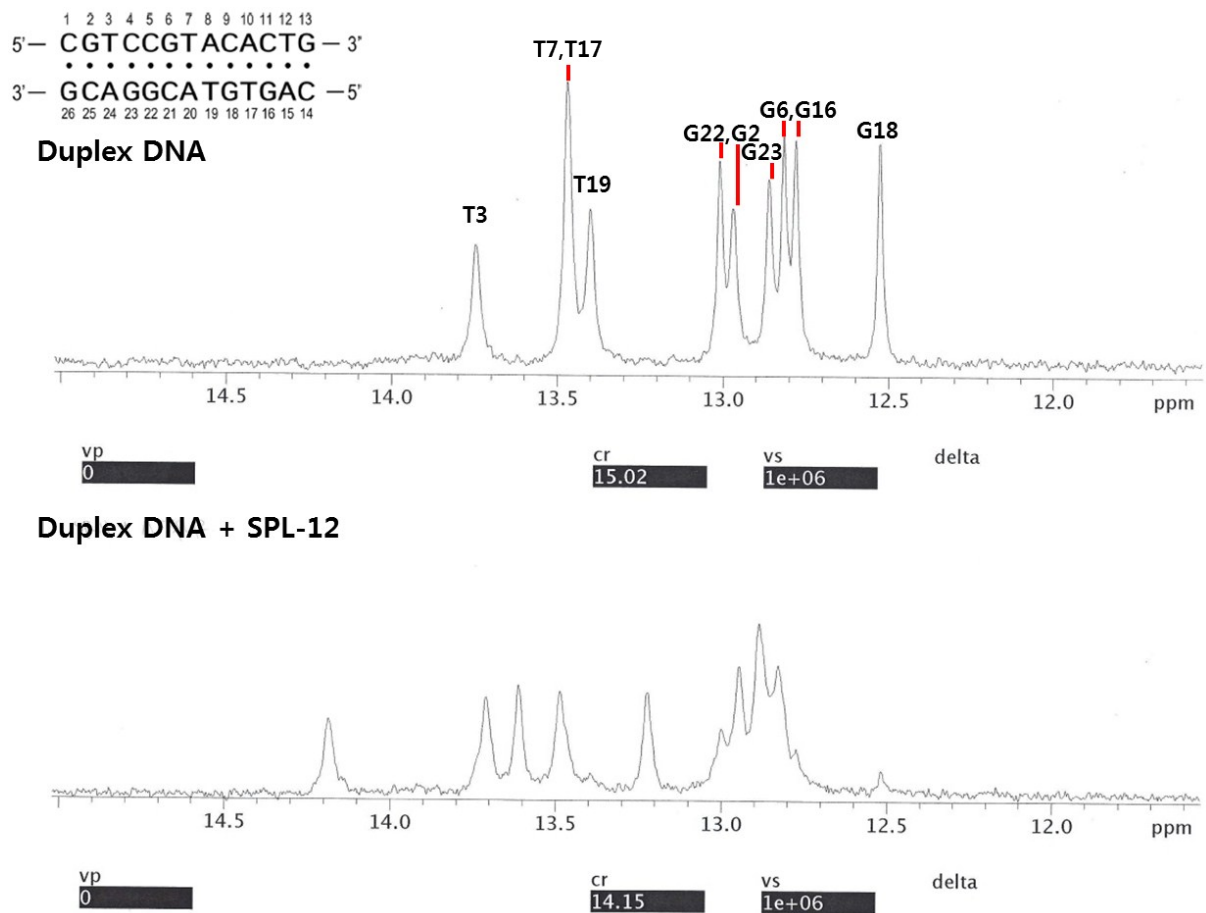

**Fig. S14** NMR spectra of duplex DNA without (upper), and with (lower) SPL-12 at 35 °C.
